# Supplementary material
Source: PubMed Central journal article supplement (PMC5875356)
Supplement: jamapsychiatry-75-316-s001.pdf [file jamapsychiatry-75-316-s001.pdf]

## Supplementary Online Content

Davis LL, Kyriakides TC, Suris AM, et al; VA CSP #589 Veterans Individual Placement and Support Toward Advancing Recovery Investigators. Effect of evidence-based supported employment vs transitional work on achieving steady work among veterans with posttraumatic stress disorder: a randomized clinical trial. *JAMA Psychiatry*. Published online February 14, 2018. doi:10.1001/jamapsychiatry.2017.4472

### **eAppendix.** Institutional Review Boards

This supplementary material has been provided by the authors to give readers additional information about their work.

**eAppendix. Institutional Review Boards**

| <b>Site</b>                                                  | <b>IRB Name</b>                                                                                               |
|--------------------------------------------------------------|---------------------------------------------------------------------------------------------------------------|
| Tuscaloosa VA Medical Center, Tuscaloosa, AL                 | Tuscaloosa VA Human Studies Subcommittee Institutional Review Board                                           |
| Raymond G. Murphy VA Medical Center, Albuquerque, NM         | Institutional Review Board New Mexico VA Health Care System                                                   |
| Birmingham VA Medical Center, Birmingham, AL                 | Birmingham VA Institutional Review Board                                                                      |
| James J. Peters VA Medical Center, Bronx, NY                 | Institutional Review Board Bronx VA Medical Center                                                            |
| Ralph H. Johnson VA Medical Center, Charleston, SC           | Institutional Review Board for Human Research Medical University of South Carolina                            |
| North Texas Healthcare System, Dallas, TX                    | VA North Texas Health Care System Dallas VAMC Institutional Review Board                                      |
| Durham VA Medical Center, Durham, NC                         | Institutional Review Board Durham VAMC Research                                                               |
| Edward Hines, Jr. VA Hospital, Hines, IL                     | Edward Hines, Jr. VA Hospital/Capt. James A. Lovell FHCC Institutional Review Board                           |
| Michael E. DeBakey VAMC, Houston, TX                         | Institutional Review Board for Human Subject Research for Baylor College of Medicine and Affiliated Hospitals |
| William S. Middleton Memorial Veterans Hospital, Madison, WI | The University of Wisconsin Madison Health Sciences IRB                                                       |
| VA Miami Healthcare System, Miami, FL                        | Human Studies Subcommittee IRB Miami VA Healthcare System                                                     |
| VA Minneapolis Health Care System, Minneapolis, MN           | Institutional Review Board Minneapolis VA Health Care System                                                  |
| San Francisco VA Medical Center, San Francisco, CA           | University of California San Francisco Human Research Protection Program Institutional Review Board           |
